# Supplementary material
Source: Springer Nature journal article supplement (https://www.springermedizin.de/resource/supplementary/12913_2009_1143_MOESM2_ESM.pdf/9528348)
Supplement: MOESM2 [file 9528348]

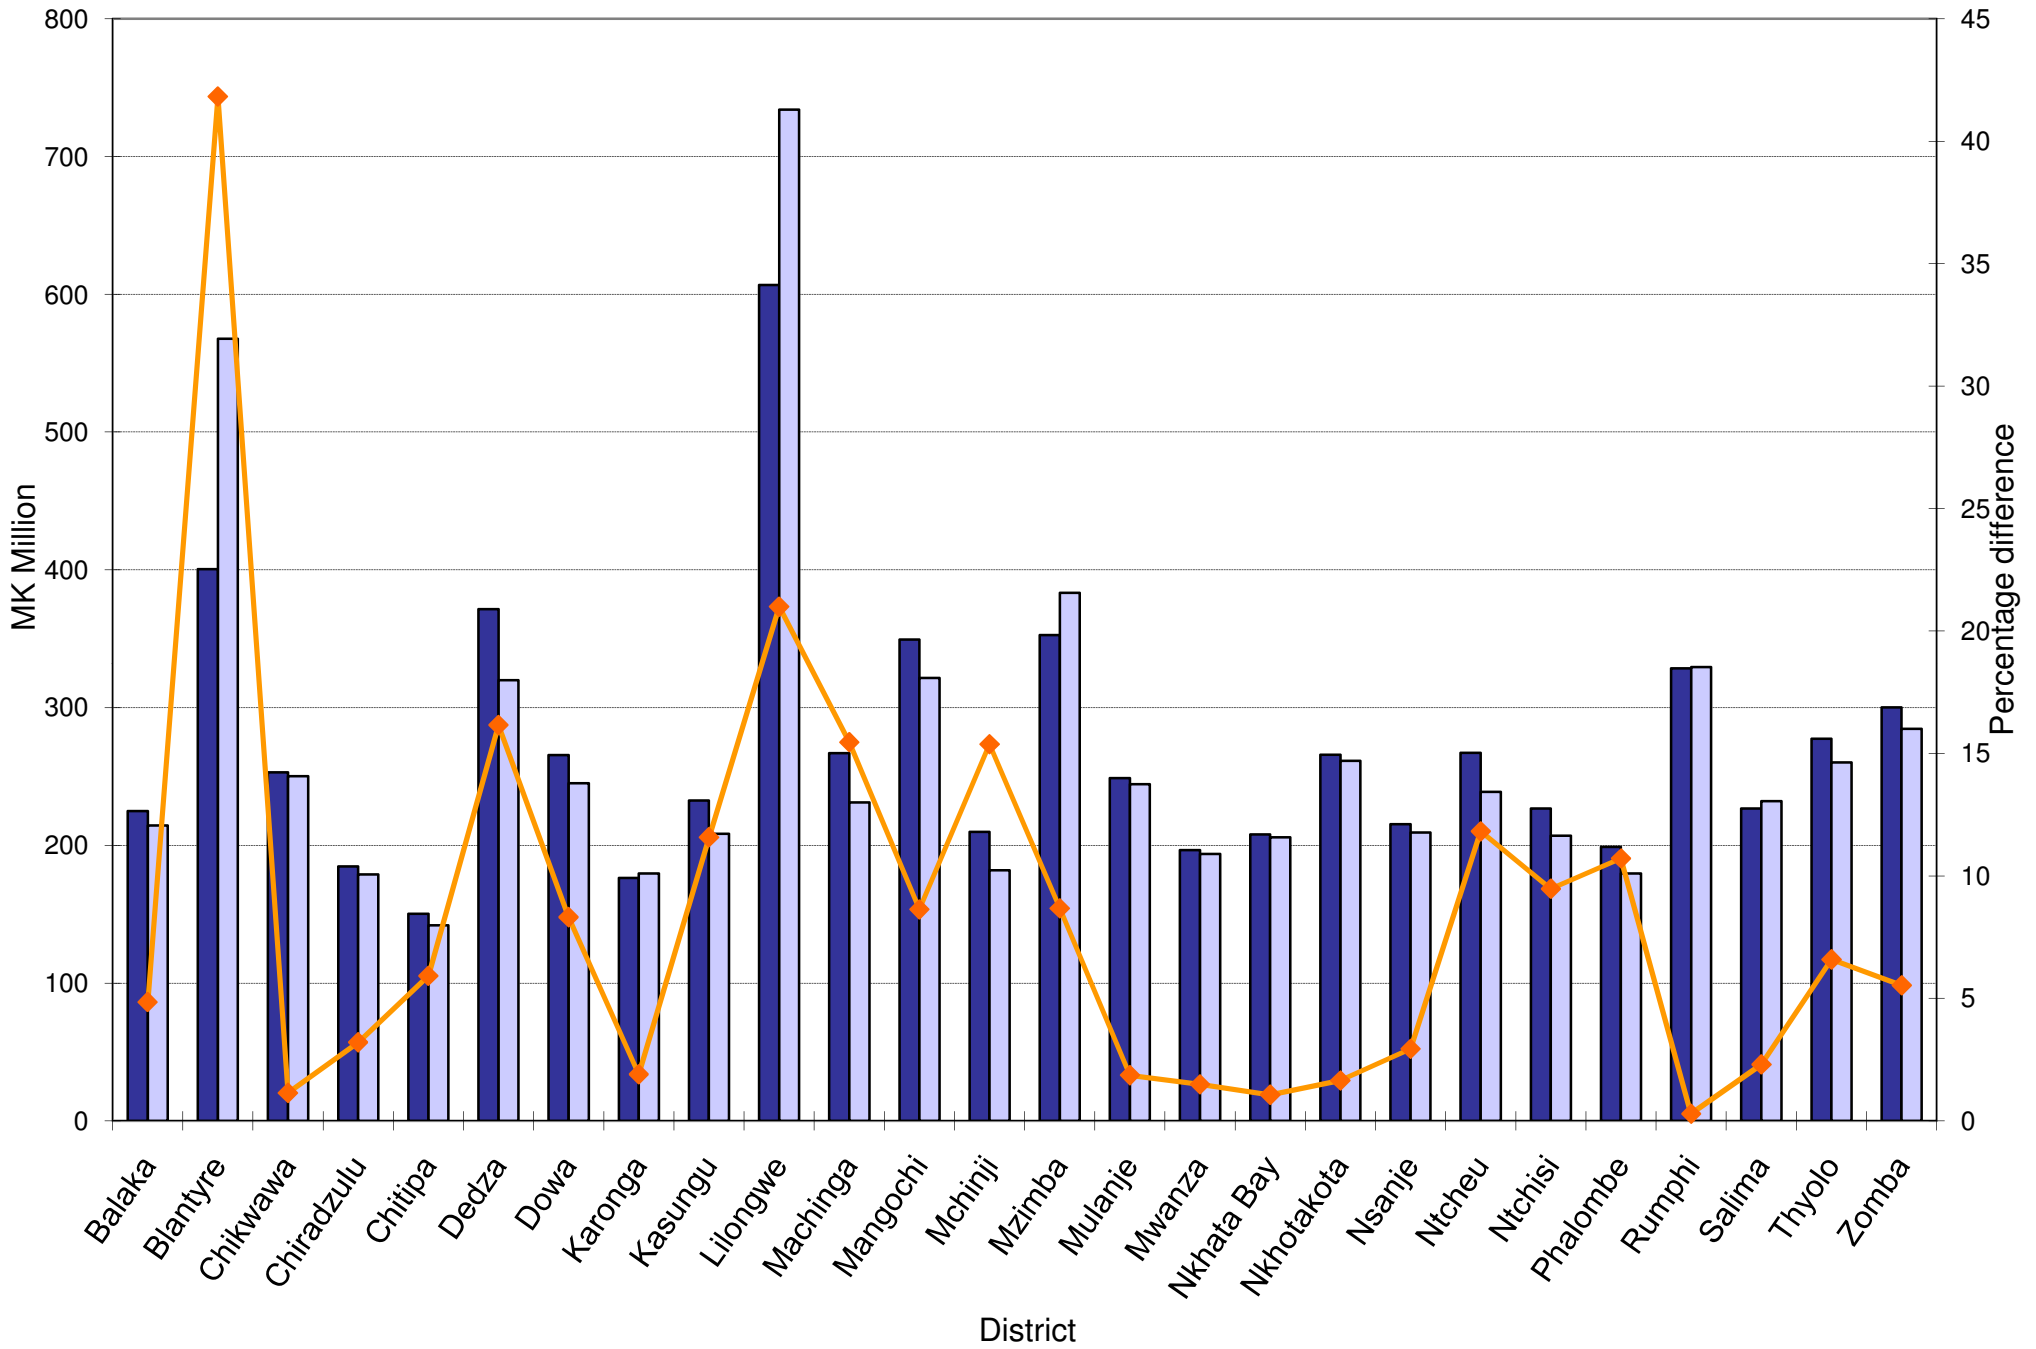

District allocations based on simple indicator (MK)
  District allocations based on composite indicator (MK)
  Percentage difference
